# Supplementary material
Source: MDPI journal article supplement (https://www.mdpi.com/2073-4352/8/10/383)
Supplement: s1 [file s1]

Supporting Information

# **Continuous Crystalline Membranes of a Ni(II)-Based Pillared-Layer Metal-Organic Framework In Situ Grown on Nickel Foam with Two Orientations**

**Yu-Qi Wu, Lin-Hua Xie \*, Xi Qin, Yu-Xiu Sun, Ya-Bo Xie \* and Jian-Rong Li**

Beijing Key Laboratory for Green Catalysis and Separation, Department of Chemistry and Chemical Engineering, College of Environmental and Energy Engineering, Beijing University of Technology, Beijing 100124, China; wuyuqi17@126.com (Y.-Q.W.); qx13582105636@163.com (X.Q.); sunyuxiutj@126.com (Y.-X.S.); jrli@bjut.edu.cn (J.-R.L.)

\* Correspondence: xielinhua@bjut.edu.cn (L.-H.X.); xieyabo@bjut.edu.cn (Y.-B.X.)

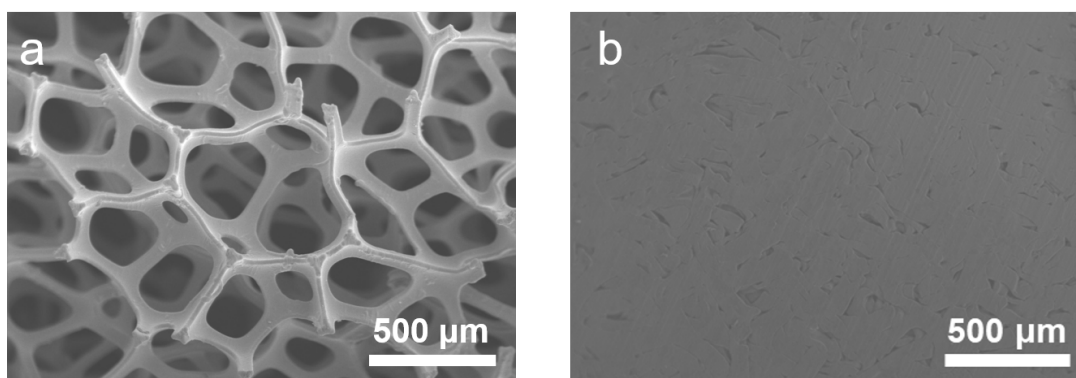

**Figure S1.** (a) SEM image of nickel foam (the nickel foam has not been folded and pressed); (b) SEM image of nickel substrate (after folding and press).

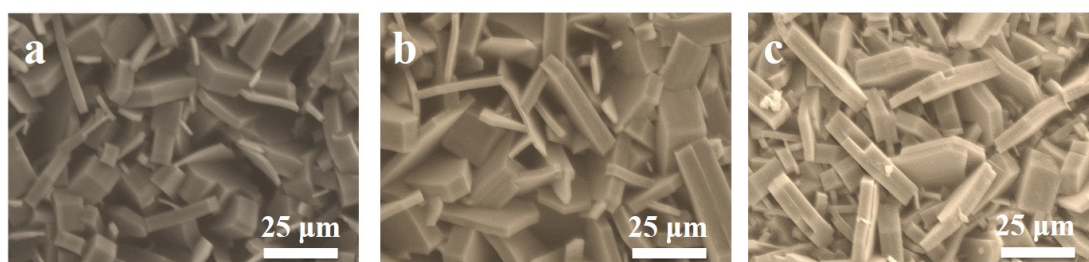

**Figure S2.** SEM images of (100) crystal plane oriented Ni(HBTC)(4,4'-bipy) membranes obtained at different reaction durations: (a) 12 h; (b) 24 h; (c) 36 h.

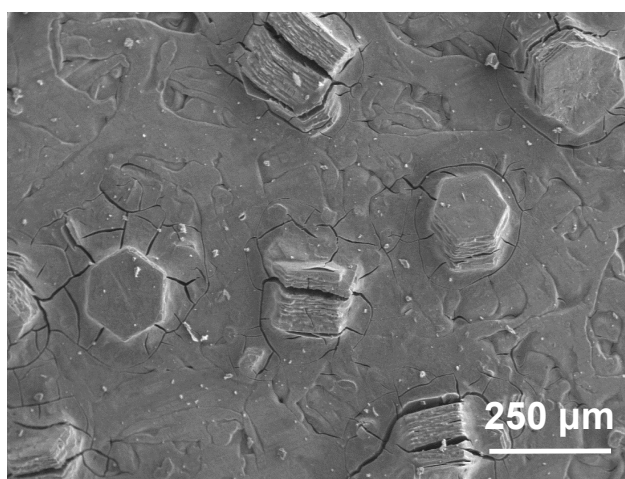

**Figure S3.** SEM image of the surface of nickel substrate after it was placed in a reaction without introducing 4,4'-bipy ligand, showing sparse MOF crystals formed on the nickel substrate.

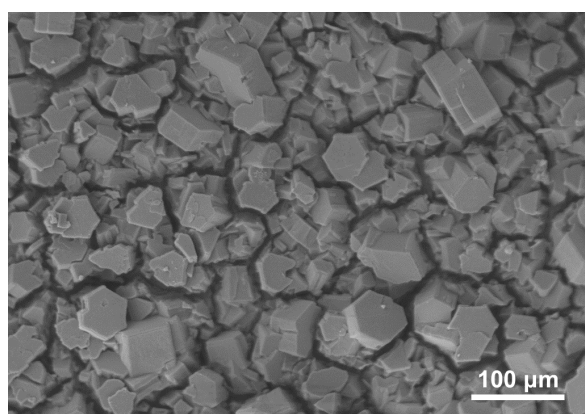

**Figure S4.** SEM image of the (001) crystal plane oriented Ni(HBTC)(4,4'-bipy) membrane after activation, showing cracking of the MOF layer.
